# Supplementary material for: Zn2+ stimulates salivary secretions via metabotropic zinc receptor ZnR/GPR39 in human salivary gland cells
Source: PubMed Central journal article supplement (PMC6881433; doi:10.1038/s41598-019-54173-3), 2019-11-27
Supplement: 41598_2019_54173_MOESM1_ESM.pdf [file 41598_2019_54173_MOESM1_ESM.pdf]

Supplementary Information for

**Zn<sup>2+</sup> stimulates salivary secretions via metabotropic zinc receptor ZnR/GPR39 in human salivary gland cells**

Yoon-Jung Kim<sup>1,\*</sup>, Youhwa Jo<sup>1,\*</sup>, Yeon-Hee Lee<sup>2</sup>, Kyungpyo Park<sup>1</sup>, Hee-Kyung Park<sup>3</sup>, and Se-Young Choi<sup>1</sup>

<sup>1</sup> Department of Physiology, Dental Research Institute, Seoul National University School of Dentistry, Seoul 03080, Republic of Korea

<sup>2</sup> Department of Orofacial Pain and Oral Medicine, Kyung Hee University Dental Hospital, Seoul 02447, Republic of Korea

<sup>3</sup> Department of Oral Medicine and Oral Diagnosis, Dental Research Institute, Seoul National University School of Dentistry, Seoul 03080, Republic of Korea

Running title: ZnR/GPR39-mediated human salivary secretion

This PDF file includes:

Figure S1

Figure S2

Figure S3

Figure S4

Figure S5

Figure S6

Figure S7

Table S1

## Supplementary Figure and Legends

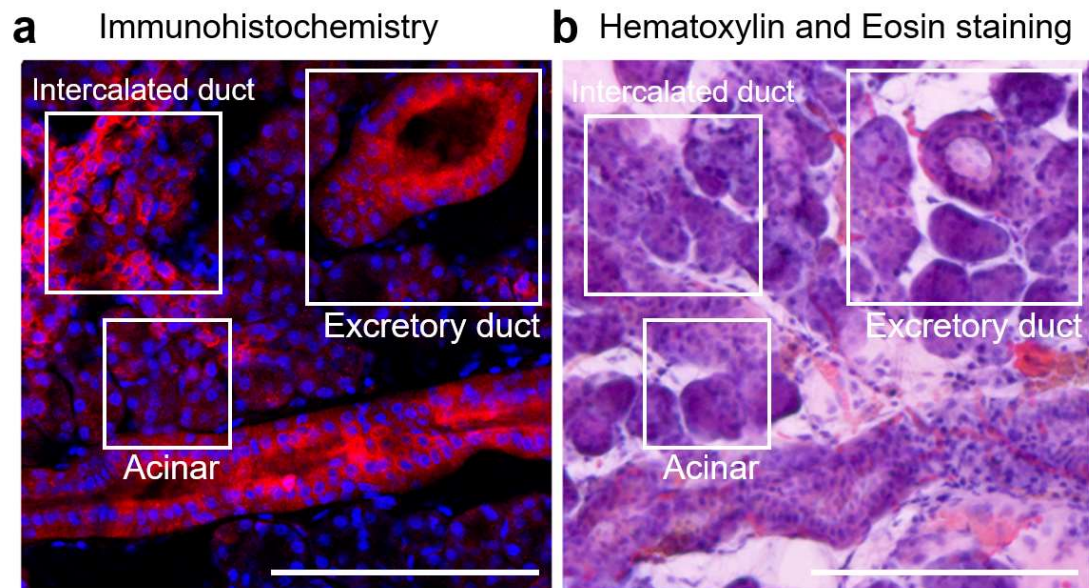

**Figure S1.** Expression of ZnR/GPR39 in human salivary glands. **(a)** Representative photomicrographs with immunostaining of ZnR/GPR39 (red) in human salivary glands. Scale bar, 150  $\mu\text{m}$ . **(b)** Histology of human salivary glands with Hematoxylin and Eosin staining. Scale bar, 150  $\mu\text{m}$ .

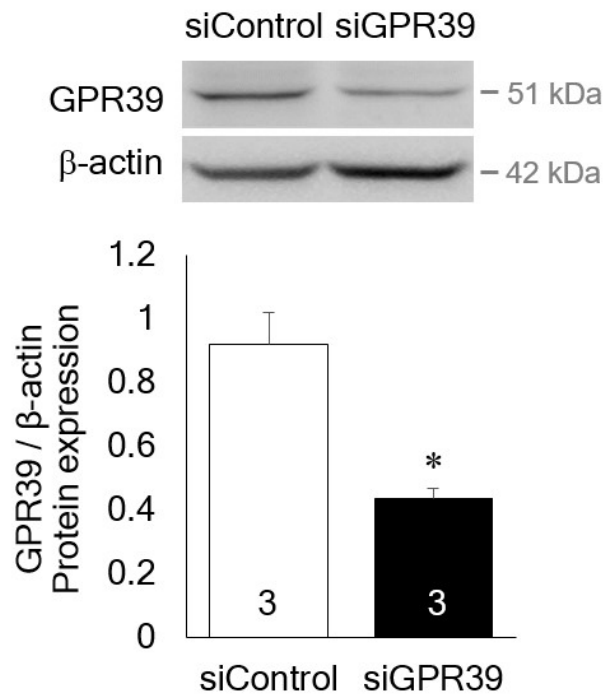

**Figure S2.** Validation of siRNA knockdown efficiency. HSG cells were transfected with siRNA Control or with siRNA ZnR/GPR39. The protein level of endogenous ZnR/GPR39 by siRNA expression was quantified by Western blot and normalized to that of β-actin (\* $P < 0.05$ ;  $n = 3$ ).

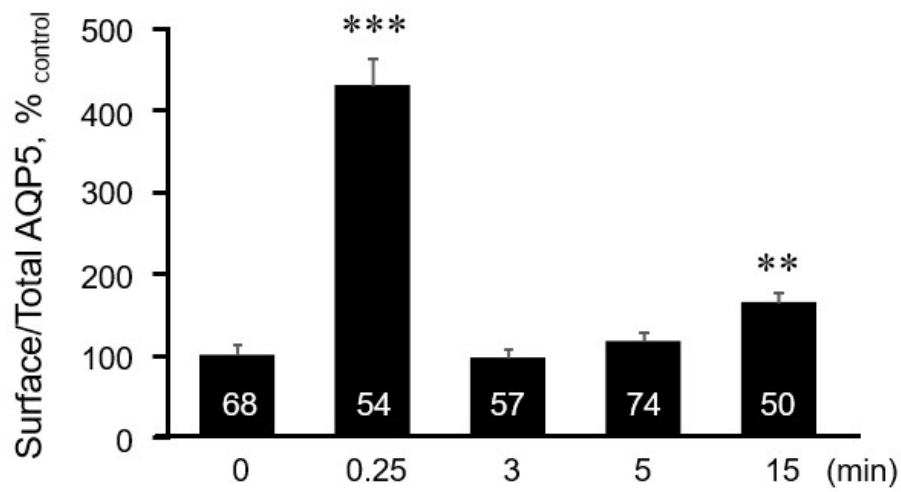

**Figure S3.**  $Zn^{2+}$  successfully increases the surface AQP-5 level on the plasma membrane in HSG cells in a short term. AQP-5-Myc-transfected HSG cells were treated with  $Zn^{2+}$  for indicated incubation times (0, 0.25, 3, 5, 15 min), and membrane translocation of AQP-5 was analyzed. Quantification of surface-to-total AQP-5 ratio was depicted as percentages of vehicle treated group. Numbers of data were indicated inside bars.  $**P < 0.01$ ,  $***P < 0.001$ , compared with vehicle control.

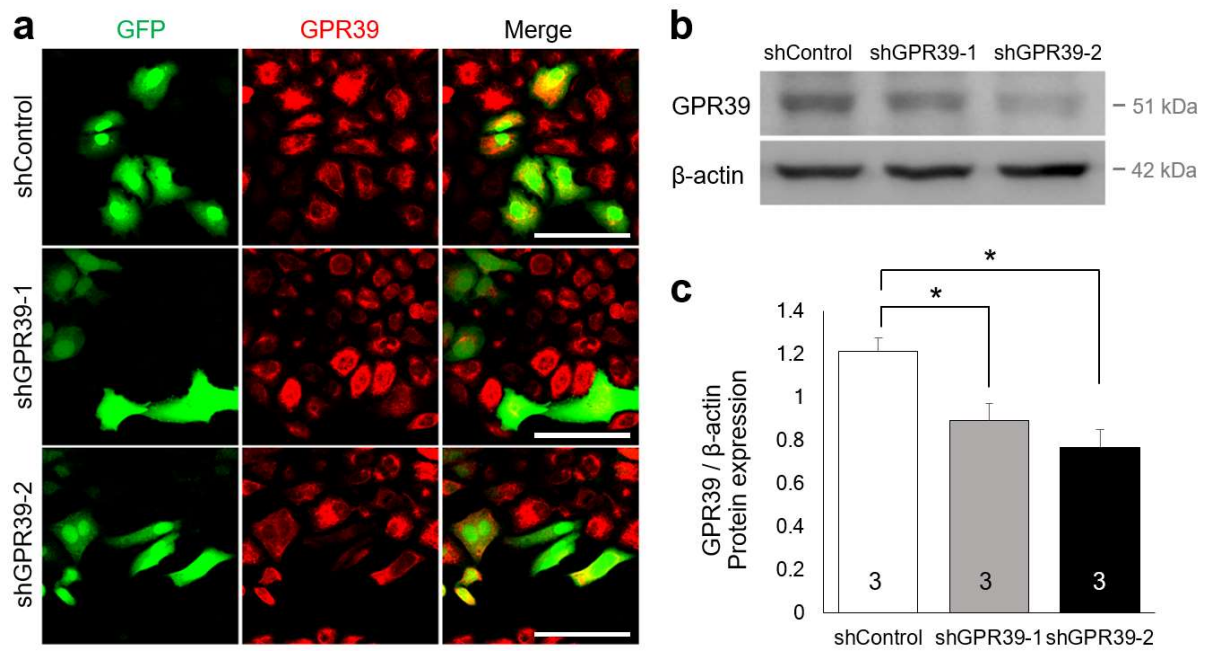

**Figure S4.** Validation of shRNA knockdown efficiency. HSG cells were transfected with shRNA Control or with shRNA ZnR/GPR39. (a) HSG cells were immunostained with anti-human ZnR/GPR39 receptors (red) in shRNA-expressing cells (green). Scale bar: 50  $\mu$ m. (b) Protein level of endogenous ZnR/GPR39 by shRNA expression by Western blot. (c) The expression was quantified and normalized to that of  $\beta$ -actin ( $*P < 0.05$ ;  $n = 3$ ).

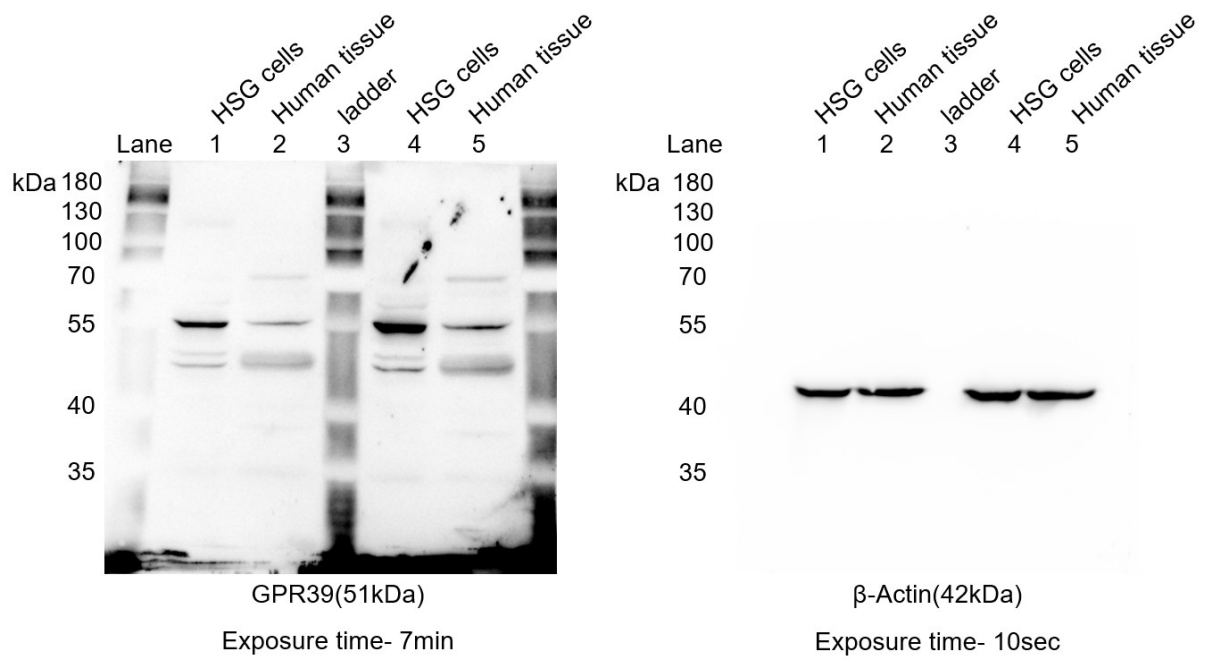

**Figure S5.** Whole gel blot image for Figure 2b.

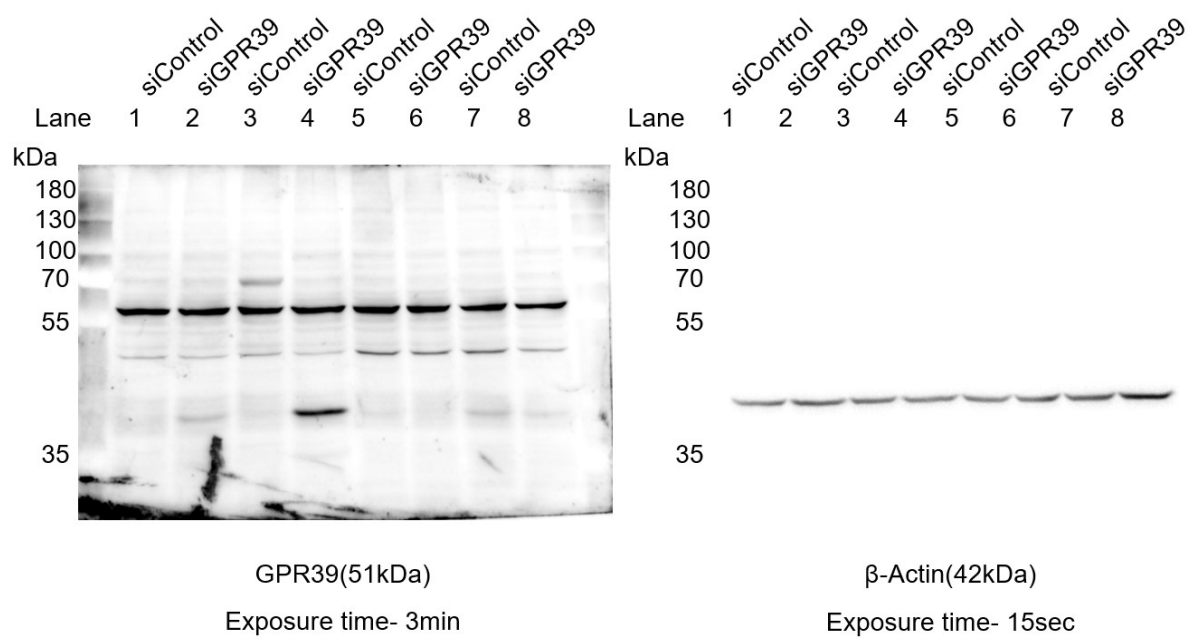

**Figure S6.** Whole gel blot image for Figure S2.

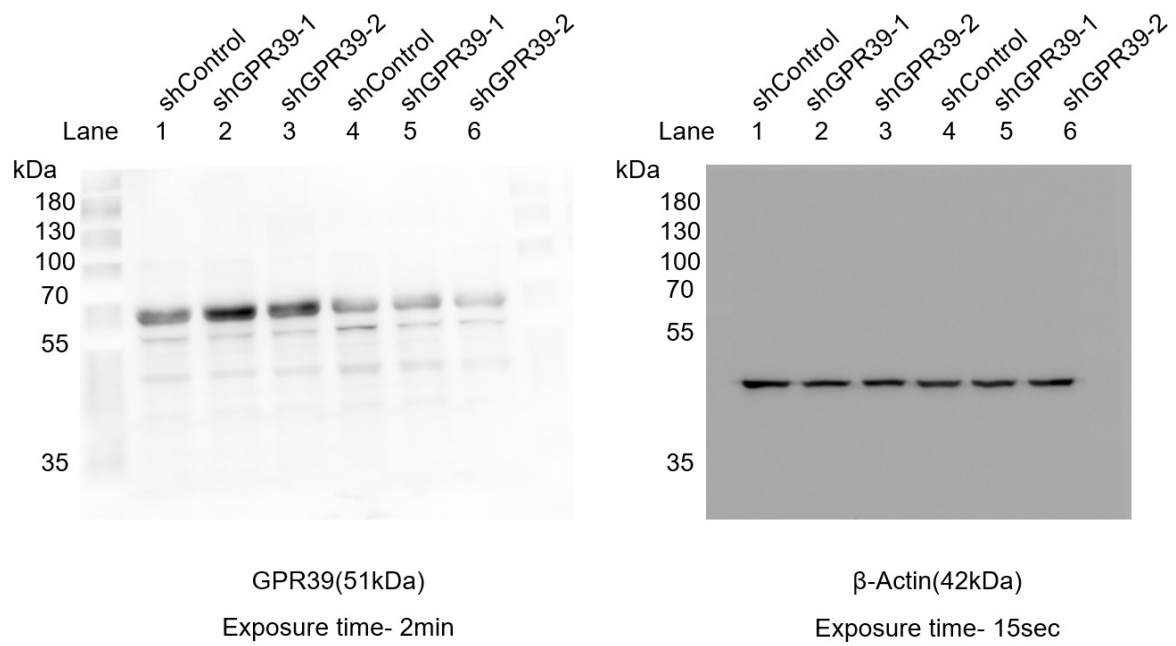

**Figure S7.** Whole gel blot image for Figure S4b.



**Table S1. Statistical analysis**

| Figure number | Test                         | Subjects                                 | Treatment                    | Number | Mean     | SEM     | Statistical test          | P value          | Degree of freedom             | post hoc test | P value |
|---------------|------------------------------|------------------------------------------|------------------------------|--------|----------|---------|---------------------------|------------------|-------------------------------|---------------|---------|
| 1a            | Salivary flow rate           | Human : Normal_Unstimulation             | Vehicle                      | 12     | 0.3225   | 0.052   | Paired Student's T-test   | 0.0308           | t(11) = -2.4759               |               |         |
|               |                              |                                          | ZnCl2                        | 12     | 0.4858   | 0.1059  |                           |                  |                               |               |         |
| 1b            | Salivary flow rate           | Human : Hyposalivation_Unstimulation     | Vehicle                      | 20     | 0.0468   | 0.0073  | Paired Student's T-test   | 0.0000           | t(19) = -6.8714               |               |         |
|               |                              |                                          | ZnCl2                        | 20     | 0.1117   | 0.0145  |                           |                  |                               |               |         |
| 1c            | Salivary flow rate           | Human : Sjögren's syndrome_Unstimulation | Vehicle                      | 9      | 0.0322   | 0.0083  | Paired Student's T-test   | 0.0047           | t(8) = -3.8732                |               |         |
|               |                              |                                          | ZnCl2                        | 9      | 0.08     | 0.0196  |                           |                  |                               |               |         |
| 1d            | Salivary flow rate           | Human : Normal_Stimulation               | Vehicle                      | 12     | 1.0383   | 0.2024  | Paired Student's T-test   | 0.0058           | t(11) = -3.4117               |               |         |
|               |                              |                                          | ZnCl2                        | 12     | 1.4183   | 0.268   |                           |                  |                               |               |         |
| 1e            | Salivary flow rate           | Human : Hyposalivation_Stimulation       | Vehicle                      | 19     | 0.2858   | 0.0493  | Paired Student's T-test   | 0.0040           | t(18) = -3.2939               |               |         |
|               |                              |                                          | ZnCl2                        | 19     | 0.52     | 0.0912  |                           |                  |                               |               |         |
| 1f            | Salivary flow rate           | Human : Sjögren's syndrome_Stimulation   | Vehicle                      | 8      | 0.3125   | 0.0549  | Paired Student's T-test   | 0.0088           | t(7) = -3.5949                |               |         |
|               |                              |                                          | ZnCl2                        | 8      | 0.4325   | 0.062   |                           |                  |                               |               |         |
| 3c            | [Ca2+]i rise                 | HSG cells w/ siControl transfection      | ZnCl2                        | 3      | 100      | 0       | Unpaired Student's T-test | 0.0000           | t(5) = 11.531                 |               |         |
|               |                              | HSG cells w/ siGPR39 transfection        | ZnCl2                        | 4      | 28.0415  | 5.2739  |                           |                  |                               |               |         |
| 3d            | [Ca2+]i rise                 | HSG cells w/ siControl transfection      | Carbachol                    | 5      | 100      | 11.9305 | Unpaired Student's T-test | 0.9972           | t(8) = 0.004                  |               |         |
|               |                              | HSG cells w/ siGPR39 transfection        | Carbachol                    | 5      | 100.0635 | 12.596  |                           |                  |                               |               |         |
| 4a            | [Ca2+]i rise                 | HSG cells                                | Vehicle - Carbachol          | 4      | 100      | 0       | Unpaired Student's T-test | 0.0000           | t(7) = 23.4179                |               |         |
|               |                              |                                          | Pirenzepine - Carbachol      | 5      | 26.9989  | 2.7492  |                           |                  |                               |               |         |
| 4b            | [Ca2+]i rise                 | HSG cells                                | Vehicle - ZnCl2              | 4      | 100      | 0       | Unpaired Student's T-test | 0.5047           | t(6) = 0.7093                 |               |         |
|               |                              |                                          | Pirenzepine - ZnCl2          | 4      | 96.4421  | 5.0157  |                           |                  |                               |               |         |
| 4c            | [Ca2+]i rise                 | HSG cells                                | Vehicle - Histamine          | 4      | 100      | 0       | Unpaired Student's T-test | 0.0000           | t(6) = 51.1979                |               |         |
|               |                              |                                          | Chlorpheniramine - Histamine | 4      | 18.3037  | 1.5957  |                           |                  |                               |               |         |
| 4d            | [Ca2+]i rise                 | HSG cells                                | Vehicle - ZnCl2              | 3      | 100      | 0       | Unpaired Student's T-test | 0.9849           | t(5) = 0.0199                 |               |         |
|               |                              |                                          | Chlorpheniramine - ZnCl2     | 4      | 100.1462 | 6.2006  |                           |                  |                               |               |         |
| 5a            | [Ca2+]i rise                 | HSG cells                                | Vehicle - ZnCl2              | 3      | 100      | 0       | ANOVA                     | 0.0015           | F(2,7) = 18.7441              | Fisher's test | 0.0005  |
|               |                              |                                          | U73122 - ZnCl2               | 3      | 3.3386   | 3.3386  |                           |                  |                               |               | 0.0064  |
|               |                              |                                          | 2APB - ZnCl2                 | 4      | 43.0372  | 14.6728 |                           |                  |                               |               |         |
| 5b            | [Ca2+]i rise                 | HSG cells                                | Vehicle - Carbachol          | 4      | 100      | 0       | ANOVA                     | 0.0000           | F(2,8) = 39.1687              | Fisher's test | 0.0000  |
|               |                              |                                          | U73122 - Carbachol           | 4      | 10.116   | 10.116  |                           |                  |                               |               | 0.0074  |
|               |                              |                                          | 2APB - Carbachol             | 3      | 60.9155  | 8.4634  |                           |                  |                               |               |         |
| 5c            | [Ca2+]i rise                 | HSG cells                                | Vehicle - Histamine          | 3      | 100      | 0       | ANOVA                     | 0.0000           | F(2,6) = 329.9546             | Fisher's test | 0.0000  |
|               |                              |                                          | U73122 - Histamine           | 3      | 2.7847   | 2.7847  |                           |                  |                               |               | 0.0000  |
|               |                              |                                          | 2APB - Histamine             | 3      | 58.2267  | 3.7241  |                           |                  |                               |               |         |
| 6c            | Surface/Total AQP5           | HSG cells w/ shControl transfection      | Vehicle                      | 42     | 100      | 17.3175 | ANOVA                     | 0.0000           | F(2,123) = 30.5924            | Fisher's test | 0.0000  |
|               |                              |                                          | Carbachol                    | 45     | 262.4289 | 18.3719 |                           |                  |                               |               | 0.0000  |
|               |                              |                                          | ZnCl2                        | 39     | 310.4228 | 23.701  |                           |                  |                               |               |         |
| 6d            | Surface/Total AQP5           | HSG cells w/ shGPR39 transfection        | Vehicle                      | 40     | 100      | 18.1825 | ANOVA                     | 0.0000           | F(2,108) = 25.6546            | Fisher's test | 0.0000  |
|               |                              |                                          | Carbachol                    | 34     | 236.4528 | 19.3628 |                           |                  |                               |               | 0.2719  |
|               |                              |                                          | ZnCl2                        | 37     | 74.2796  | 11.9355 |                           |                  |                               |               |         |
| S2            | GRP39 / $\beta$ -actin ratio | HSG cells                                | siControl                    | 3      | 0.9189   | 0.1027  | Unpaired Student's T-test | 0.0107           | t(4) = 4.5097                 |               |         |
|               |                              |                                          | siGPR39                      | 3      | 0.4355   | 0.0307  |                           |                  |                               |               |         |
| S3            | Surface/Total AQP5           | HSG cells                                | ZnCl2 untreated (0 min)      | 68     | 100      | 12.2781 | ANOVA                     | 0.0000           | F(4,298) = 64.5034            | Fisher's test | 0.0000  |
|               |                              |                                          | ZnCl2 treated for 0.25 min   | 54     | 429.2158 | 33.3261 |                           |                  |                               |               | 0.8824  |
|               |                              |                                          | ZnCl2 treated for 3 min      | 57     | 96.4951  | 11.1175 |                           |                  |                               |               | 0.4531  |
|               |                              |                                          | ZnCl2 treated for 5 min      | 74     | 116.6295 | 10.6216 |                           |                  |                               |               | 0.0094  |
|               |                              |                                          | ZnCl2 treated for 15 min     | 50     | 164.2087 | 11.1529 |                           |                  |                               |               |         |
| S4c           | GRP39 / $\beta$ -actin ratio | HSG cells                                | shControl                    | 3      | 1.2148   | 0.0626  | Unpaired Student's T-test | 0.0319<br>0.0123 | t(4) = 3.2335<br>t(4) = 4.331 |               |         |
|               |                              |                                          | shGPR39-1                    | 3      | 0.8939   | 0.1333  |                           |                  |                               |               |         |
|               |                              |                                          | shGPR39-2                    | 3      | 0.7686   | 0.0818  |                           |                  |                               |               |         |
